# Supplementary material for: Enhanced Susceptibility of Ogg1 Mutant Mice to Multiorgan Carcinogenesis
Source: MDPI journal article supplement (doi:10.3390/ijms18081801), 2017-08-18
Supplement: s1 [file s1]

# Supplementary Materials: Enhanced Susceptibility of *Ogg1* Mutant Mice to Multiorgan Carcinogenesis

Anna Kakehashi \*, Naomi Ishii, Takahiro Okuno, Masaki Fujioka, Min Giand Hideki Wanibuchi

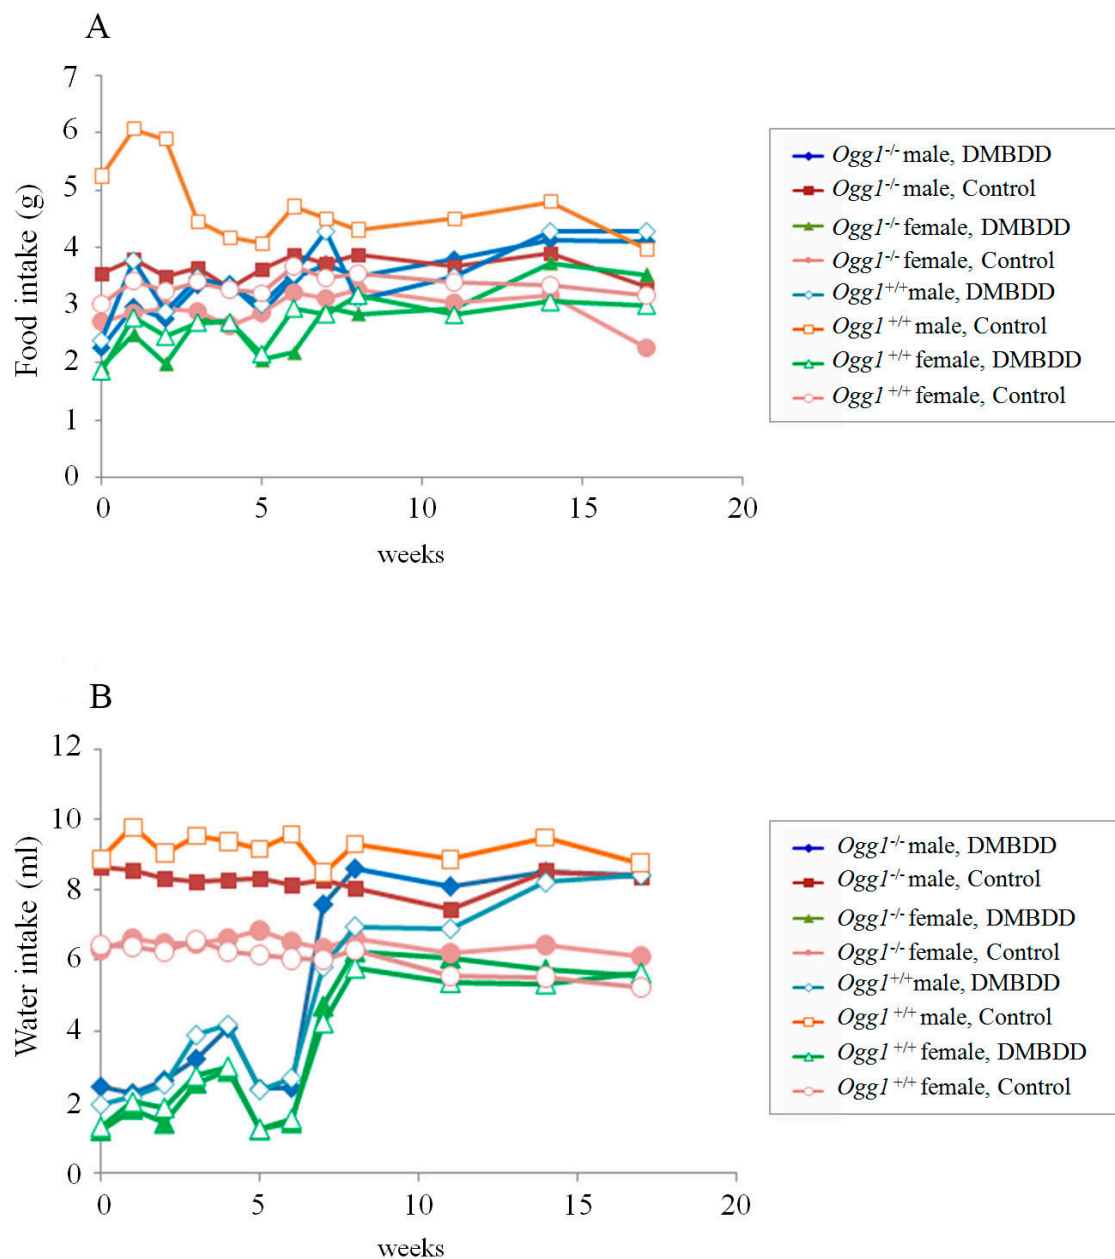

**Figure S1.** Food (A); and water (B) intakes of DMBDD-treated and control *Ogg1*<sup>-/-</sup> and *Ogg1*<sup>+/+</sup> mice.
